# Supplementary material for: Biodiversity and Distribution of Reticulitermes in the Southeastern USA
Source: MDPI journal article supplement (doi:10.3390/insects13070565), 2022-06-22
Supplement: s1 [file s1]

**Table S1.** List of publications that provide information on subterranean termite species distributions in the Eastern United States including the following 5 species; Rf= *R. flavipes*, Rv= *R. virginicus*, Rh= *R. hageni*, Rm= *R. mallei*, Rn= *R. nelsonae*, reported by state (standard abbreviations), sample collection method and corresponding citation. WL= samples from wildlands wood on ground or research plots; S = samples from pest management professionals; T= samples from light trap surveys; MC= samples from museum collections; Li= literature search; NM= Not mentioned.

| Regional Publications                        |                                    |                    |                          |
|----------------------------------------------|------------------------------------|--------------------|--------------------------|
| State                                        | <i>Reticulitermes spp</i> reported | Collection methods | Citation                 |
| GA FL SC NC VA WV KY TN AL MS                | Rf                                 | WL; S              | [54]                     |
| TX FL SC VA                                  | Rh                                 |                    |                          |
| GA LA FL NC VA                               | Rv                                 |                    |                          |
| TX LA AK MS AL GA FL SC NC TN KY VA WV       | Rf                                 | Li                 | Light and Pickens, 1946  |
| LA AK MS AL GA TN KY SC NC FL VA WV          | Rh                                 |                    |                          |
| LA AK MS AL GA TN KY SC NC FL VA WV          | Rv                                 |                    |                          |
| TX LA MS AK TN GA FL SC NC KY VA WV IL WI MI | Rf                                 | NM                 | Snyder, 1946             |
| IN OH PA NY DW MD VT MA CT ME                |                                    |                    |                          |
| LA MS GA FL SC NC VA WV KY MD DE IL IN OH    | Rh                                 |                    |                          |
| LA MS GA FL SC NC VA WV KY MD DE IL IN OH    | Rv                                 |                    |                          |
| TX LA MS AK TN GA FL SC NC KY VA WV IL WI MI | Rf                                 | NM                 | [25]                     |
| IN OH PA NY DW MD VT MA CT MO                |                                    |                    |                          |
| LA AK MS AL GA FL SC NC TN KY VA WV          | Rh                                 |                    |                          |
| LA AK MS AL GA FL SC NC TN KY VA WV          | Rv                                 |                    |                          |
| FL LA TX                                     | Rf                                 | S                  | [22]                     |
| LA                                           | Rh                                 |                    |                          |
| FL LA                                        | Rv                                 |                    |                          |
| GA SC NC AL TN MS VA WV                      | Rf                                 | WL                 | [58]                     |
| GA TN                                        | Rv                                 |                    |                          |
| GA AL                                        | Rm                                 |                    |                          |
| AL                                           | Rn                                 |                    |                          |
| GA SC NC AL TN MS WV VA KY                   | Rf                                 | WL                 | Hyseni and Garrick, 2019 |
| GA KY VA AL SC NC                            | Rv                                 |                    |                          |
| AL SC                                        | Rm                                 |                    |                          |
| State Surveys                                |                                    |                    |                          |
| State                                        | <i>Reticulitermes spp</i> reported | Collection methods | Citation                 |
| Alabama                                      | Rf, Rh, Rv, Rm                     | WL MC              | [61]                     |
| Florida                                      | Rf, Rh, Rv                         | S, Li              | [24]                     |

|                |                    |           |                         |
|----------------|--------------------|-----------|-------------------------|
|                | Rf, Rh, Rv         | S         | Scheffrahn et al., 1988 |
|                | Rf, Rh, Rv         | S         | [53]                    |
| Georgia        | Rf, Rv             | N/A       | (Light, 1946)           |
|                | Rf, Rv, Rh         | WL MC     | Scheffrahn et al., 2001 |
|                | Rf, Rv, Rh, Rm, Rn | WL        | [27]                    |
| Louisiana      | Rf, Rv, Rh         | S         | [63]                    |
| Mississippi    | Rf, Rv             | WL        | Wang and Powell, 2001   |
| South Carolina | Rf, Rh, Rv         | WL S MC T | Hathorne et al., 2000   |
| Texas*         | Rf, Rv, Rh         | S MC      | Howell et al., 1987     |

\* Rt= *R. tibialis* also reported in Howell et al., 1987.
