# Supplementary material for: Biodiversity and Distribution of Reticulitermes in the Southeastern USA
Source: MDPI journal article supplement (doi:10.3390/insects13070565), 2022-06-22
Supplement: s1 [file s1]

**Table S2.** GenBank Accession numbers for the ITA-Verified COI and COII sequences termed Reference Sequence along with collection date and locale. The reference sequences were used to designate survey samples to a species designation using a GTR + G + I ML program.

| COI                  |               |                |                        |
|----------------------|---------------|----------------|------------------------|
| Species              | Accession No. | Date Collected | Location               |
| <i>C. formosanus</i> | AY027472      | 2001           | USA                    |
| <i>R. flavipes</i>   | JN207470      | 2/6/07         | Sapelo Island, GA, USA |
|                      | JN207471      | 2007           | Sapelo Island, GA, USA |
|                      | JN207472      | 11/13/07       | Sapelo Island, GA, USA |
|                      | JN207473      | 11/23/07       | Sapelo Island, GA, USA |
|                      | JN207474      | 10/23/07       | Athens, GA, USA        |
|                      | JN207475      | 4/13/09        | Athens, GA, USA        |
|                      | JN207476      | 4/25/09        | Athens, GA, USA        |
|                      | JN207477      | 4/21/09        | Athens, GA, USA        |
|                      | F182          | 3/12/14        | Athens, GA, USA        |
|                      | F192          | 3/20/19        | Athens, GA, USA        |
| <i>R. hageni</i>     | JN207483      | 2007           | Athens, GA, USA        |
|                      | H13           | 8/20/13        | Clarke, Co. USA        |
| <i>R. virginicus</i> | JN207478      | 11/13/07       | Sapelo Island, GA, USA |
|                      | JN207479      | 1/30/08        | Sapelo Island, GA, USA |
|                      | JN207480      | 2007           | Athens, GA, USA        |
|                      | JN207481      | 10/23/07       | Athens, GA, USA        |
|                      | JN207482      | 10/23/07       | Athens, GA, USA        |
|                      | V41           | 5/10/16        | Athens, GA, USA        |
|                      | V44           | 5/13/17        | Athens, GA, USA        |
| <i>R. nelsonae</i>   | JN207486      | 2/6/07         | Sapelo Island, GA, USA |
|                      | JN207487      | 2007           | Sapelo Island, GA, USA |
|                      | JN207488      | 1/30/08        | Sapelo Island, GA, USA |
|                      | JN207489      | 2/6/07         | Sapelo Island, GA, USA |
|                      | JN207490      | 2/6/07         | Sapelo Island, GA, USA |
|                      | JN207491      | 2/6/07         | Sapelo Island, GA, USA |
|                      | N5            | 2/6/07         | McIntosh Co, GA, USA   |
|                      | N9            | 3/31/11        | Branford, FL, USA      |
|                      | N10           | 4/18/13        | McIntosh, GA, USA      |
| <i>R. malletei</i>   | JN207484      | 2007           | Athens, GA, USA        |

|                      | JN207485    | 10/23/07       | Athens, GA, USA        |
|----------------------|-------------|----------------|------------------------|
|                      | M47         | 5/14/12        | Athens, GA, USA        |
| COII                 |             |                |                        |
| Species              | Accession # | Date Collected | Location               |
| <i>C. formosanus</i> | AY683218    | 6/12/03        | Savannah, GA, USA      |
| <i>R. flavipes</i>   | JF796216    | 2009           | Athens, GA, USA        |
|                      | JF796217    | 8/25/09        | Thomasville, GA, USA   |
|                      | JF796218    | 7/6/09         | USA                    |
|                      | JF796219    | 3/31/10        | Branford, FL, USA      |
|                      | JF796220    | 11/5/10        | Branford, FL, USA      |
|                      | F2          | 4/19/96        | Pike Co., GA, USA      |
|                      | F24         | 3/28/02        | Clarke Co., GA, USA    |
|                      | F42         | 4/19/12        | Clarke Co., GA, USA    |
|                      | F50         | 2/13/13        | Clarke Co., GA, USA    |
|                      | F51         | 2/20/13        | Clarke Co., GA, USA    |
|                      | F52         | 2/28/13        | Athens, GA, USA        |
|                      | F58         | 4/13/13        | Athens, GA, USA        |
|                      | F174        | 3/10/13        | Athens, GA, USA        |
|                      | F182        | 3/12/14        | Athens, GA, USA        |
|                      | F192        | 3/20/19        | Athens, GA, USA        |
|                      | F193        | 4/27/19        | Athens, GA, USA        |
|                      | FJB         | 3/4/21         | Athens, GA, USA        |
| <i>R. hageni</i>     | AF107486    | 8/97           | Barnesville, GA, USA   |
|                      | JF796224    | 2007           | Athens, GA, USA        |
|                      | JF796225    | 2007           | Athens, GA, USA        |
|                      | EU689026    | 2008           | USA                    |
|                      | H11         | 8/5/07         | Athens, GA, USA        |
|                      | H13         | 8/20/13        | Clarke Co., GA, USA    |
|                      | H18         | 8/15/16        | Athens, GA, USA        |
|                      | H19         | 8/15/16        | Athens, GA, USA        |
| <i>R. virginicus</i> | JF796234    | 5/26/05        | Madison, FL, USA       |
|                      | JF796223    | 2009           | Thomasville, GA, USA   |
|                      | JF796222    | 7/5/09         | Sapelo Island, GA, USA |
|                      | JF796221    | 5/30/08        | Athens, GA, USA        |

|                    |          |          |                        |
|--------------------|----------|----------|------------------------|
|                    | V41      | 5/10/16  | Athens, GA, USA        |
|                    | V44      | 5/13/17  | Athens, GA, USA        |
|                    | V46      | 5/14/17  | Athens, GA, USA        |
|                    | V47      | 5/14/17  | Athens, GA, USA        |
| <i>R. nelsonae</i> | JF796235 | N/A      | Sapelo Island, GA, USA |
|                    | JF796229 | 2009     | Croatan NF, NC, USA    |
|                    | JF796233 | 12/20/06 | Apopka, FL, USA        |
|                    | JF796232 | 6/18/09  | GA, USA                |
|                    | JF796231 | 3/31/10  | Branford, FL, USA      |
|                    | JF796230 | 2009     | Thomasville, GA, USA   |
|                    | EU689013 | 2008     | GA, USA                |
|                    | N5       | 2/6/07   | McIntosh Co, GA, USA   |
|                    | N9       | 3/31/11  | Branford, FL, USA      |
|                    | N10      | 4/18/13  | McIntosh, GA, USA      |
|                    | N11      | 4/8/13   | McIntosh Co, GA, USA   |
|                    | N12      | 5/29/10  | Athens, GA, USA        |
| <i>R. malletei</i> | JF796226 | 10/23/07 | Athens, GA, USA        |
|                    | JF796228 | 2009     | NC, USA                |
|                    | GU550074 | N/A      | USA                    |
|                    | JF796227 | 5/21/10  | Athens, GA, USA        |
|                    | M11      | 4/26/00  | Winston, MS, USA       |
|                    | M47      | 5/14/12  | Athens, GA, USA        |
|                    | M49      | 6/24/12  | Athens, GA, USA        |
|                    | M62      | 5/26/14  | Athens, GA, USA        |
|                    | M44      | 4/22/12  | Athens, GA, USA        |
