# Supplementary material for: Biodiversity and Distribution of Reticulitermes in the Southeastern USA
Source: MDPI journal article supplement (doi:10.3390/insects13070565), 2022-06-22
Supplement: s1 [file s1]

**Table S5.** Accession numbers for the 16 COII sequences used to construct the global comparison phylogeny in Figure 5 along with collection date and locale. These sequences were used alongside ITA-Verified reference sequence (Table S2) to designate accessions to a species designation using a GTR + G + I ML phylogeny.

| COII                  |               |                 |                                       |
|-----------------------|---------------|-----------------|---------------------------------------|
| Species               | Accession No. | Submission Date | Location                              |
| <i>R. balkanensis</i> | KM245783.1    | 7/14/14         | Schinias, Greece                      |
|                       | KM245784.1    | 7/25/14         | Nea Makri, Greece                     |
| <i>R. urbis</i>       | DQ866972.1    | 7/26/06         | Igoumenitsa, Greece                   |
|                       | JQ231196.1    | 12/3/11         | Castellaneta, Italy                   |
| <i>R. speratus</i>    | KM245821.1    | 7/25/14         | Kamigamo, Kyoto, Japan                |
|                       | KM245819.1    | 7/25/14         | Motoyama, Kochi, Japan                |
| <i>R. chinensis</i>   | AB050705.1    | 11/1/2000       | Beijing, China                        |
|                       | JX142148.1    | 6/6/12          | Changping, Beijing, China             |
|                       | FJ423454.1    | 10/28/08        | Beijing, China                        |
| <i>R. kanmonensis</i> | KM245812.1    | 7/25/14         | Ejio Park, Yamaguchi, Japan           |
|                       | KM245811.1    | 7/25/14         | Ejio Park, Yamaguchi, Japan           |
| <i>R. hesperus</i>    | DQ018960.1    | 4/26/05         | CA, USA                               |
|                       | AY623447.1    | 5/12/04         | CA, USA                               |
|                       | KM245769.1    | 7/25/14         | Placerville, CA, USA                  |
|                       | KM245770.1    | 7/25/14         | Novato, CA, USA                       |
| <i>R. tibialis</i>    | AY808094.1    | 11/1/04         | AZ, USA                               |
|                       | AF525355.1    | 6/28/02         | AZ, USA                               |
|                       | HM208248.1    | 5/6/10          | CA, USA                               |
| <i>R. lucifugus</i>   | JQ231194.1    | 12/3/11         | Pisticci, Marina, Italy               |
|                       | JQ231192.1    | 12/3/11         | Marina di Lesina, Italy               |
|                       | EF591507.1    | 5/3/07          | Corsica, Bastia, France               |
| <i>R. banyulensis</i> | KM245779.1    | 7/25/14         | Teruel, Spain                         |
|                       | KM245778.1    | 7/25/14         | Cassis, France                        |
| <i>R. grassei</i>     | MN107083.1    | 7/24/19         | France                                |
|                       | MT188739.1    | 3/12/20         | Foret Coubre, Point Espagnols, France |
