# Supplementary material for: Biodiversity and Distribution of Reticulitermes in the Southeastern USA
Source: MDPI journal article supplement (doi:10.3390/insects13070565), 2022-06-22
Supplement: s1 [file s1]

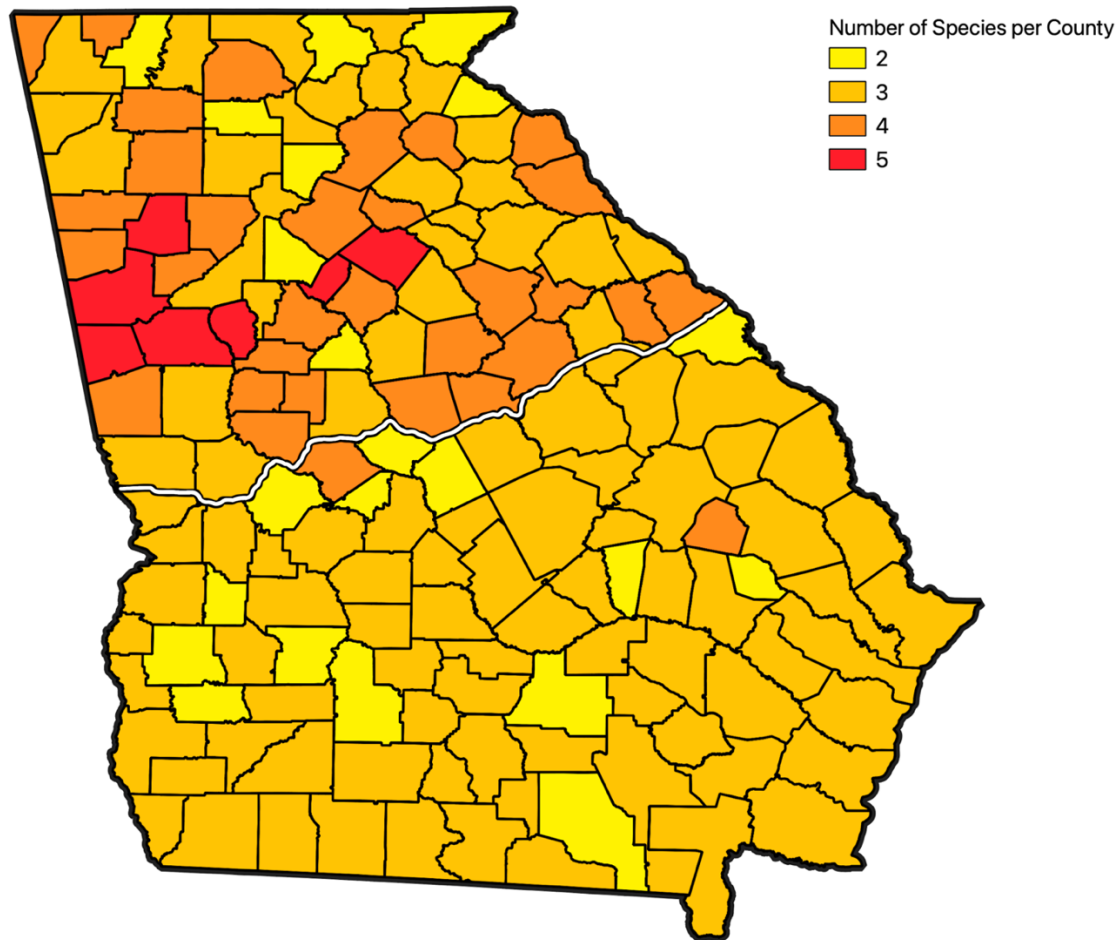

**Figure S1.** Map of the State of Georgia, USA by county showing the number of *Reticulitermes* species collected per county (n=159). The Fall Line is illustrated by a white line along the 32nd-33rd parallel.
