# Supplementary material for: Biodiversity and Distribution of Reticulitermes in the Southeastern USA
Source: MDPI journal article supplement (doi:10.3390/insects13070565), 2022-06-22
Supplement: s1 [file s1]

**Table S3.** Citations for the 17 *Reticulitermes* field surveys in the SE USA published between 2012-2022 including species mentioned, year published, and index to the citation.

| Species Mentioned  | Year | Citation                       |
|--------------------|------|--------------------------------|
| Rf, Rm             | 2012 | Fredericks, 2012               |
| Rf, Rv, Rh         | 2012 | Blount, 2012                   |
| Genus only         | 2013 | Little et al., 2013            |
| Genus only         | 2014 | Ulyshen, 2014                  |
| Genus only         | 2014 | Little et al., 2014            |
| Genus only         | 2014 | Riggins et al., 2014           |
| Rf, Rv, Rh, Rm, Rn | 2015 | Janowiecki, 2015               |
| Rf, Rv, Rh, Rm     | 2015 | Janowiecki and Szalanski, 2015 |
| Rf                 | 2016 | Su et al., 2016                |
| Genus only         | 2016 | Clay et al., 2016              |
| Rf, Rv, Rm         | 2019 | Hyseni and Garrick, 2019       |
| Rf                 | 2019 | Hyseni and Garrick, 2019       |
| Rf, Rv, Rm         | 2020 | Hyseni, 2020                   |
| Rf, Rv, Rh, Rm, Rn | 2021 | Janowiecki and Vargo, 2021     |
| Rf, Rv, Rh         | 2021 | [49]                           |
| Rf                 | 2021 | Aguero et al., 2021            |
| Rf, Rv             | 2021 | Shults et al., 2021            |
