# Supplementary material for: Biodiversity and Distribution of Reticulitermes in the Southeastern USA
Source: MDPI journal article supplement (doi:10.3390/insects13070565), 2022-06-22
Supplement: s1 [file s1]

**Table S4.** COI, COII, and 16S accessions included in Maximum-Likelihood phylogenies with ITA-verified references that did not align in a clade matching the GenBank species designation. Table includes accession, collection location, GenBank species designation and updated based- on-grouping-with-ITA species designations, and publications referencing those aberrant accessions.

| COI          |                                          |                             |                         |                                                                                         |
|--------------|------------------------------------------|-----------------------------|-------------------------|-----------------------------------------------------------------------------------------|
| Accession(s) | Collection Locale                        | GenBank Species Designation | ITA Species Designation | Publications                                                                            |
| EF206320*    | Hamilton, Co. FL                         | <i>R. hageni</i>            | <i>R. nelsonae</i>      | [29, 70] Bourguignon et al., 2014                                                       |
| COII         |                                          |                             |                         |                                                                                         |
| Accession(s) | Collection Locale                        | GenBank Species Designation | ITA Species Designation | Publications                                                                            |
| EF206320*    | Hamilton, Co. FL                         | <i>R. hageni</i>            | <i>R. nelsonae</i>      | [29, 70] Bourguignon et al., 2014; Wang et al., 2016; Lee et al., 2017; Li et al., 2018 |
| AF525328*    | Cumberland Island, GA & AR <sup>†</sup>  | <i>R. hageni</i>            | <i>R. nelsonae</i>      | [30, 64] Austin et al., 2004; Nobre et al., 2006                                        |
| AY808089*    | Seminole Co. FL                          | <i>R. hageni</i>            | <i>R. nelsonae</i>      | [50]                                                                                    |
| AY808088*    | Brevard, FL                              | <i>R. hageni</i>            | <i>R. nelsonae</i>      | [50]                                                                                    |
| AY536419     | Jasper Pulaski IN                        | <i>R. virginicus</i>        | <i>R. nelsonae</i>      | Direct GenBank Submission                                                               |
| AY536418     | Jasper Pulaski IN                        | <i>R. virginicus</i>        | <i>R. nelsonae</i>      | Direct GenBank Submission                                                               |
| AY536424     | Indiana Dunes, Paradise Valley Ridge, IN | <i>R. virginicus</i>        | <i>R. nelsonae</i>      | Direct GenBank Submission                                                               |
| AY536422     | Jasper Pulaski, IN                       | <i>R. virginicus</i>        | <i>R. nelsonae</i>      | Direct GenBank Submission                                                               |
| AY536423     | Jasper Pulaski, IN                       | <i>R. virginicus</i>        | <i>R. nelsonae</i>      | Direct GenBank Submission                                                               |
| AY536425     | Indiana Dunes, Paradise Valley Ridge, IN | <i>R. virginicus</i>        | <i>R. nelsonae</i>      | Direct GenBank Submission                                                               |
| AY536417     | Jasper Pulaski, IN                       | <i>R. virginicus</i>        | <i>R. nelsonae</i>      | Direct GenBank Submission                                                               |
| AY536421     | Jasper Pulaski, IN                       | <i>R. virginicus</i>        | <i>R. malletei</i>      | Direct GenBank Submission                                                               |
| 16S**        |                                          |                             |                         |                                                                                         |
| Accession(s) | Collection Locale                        | GenBank Species Designation | ITA Species Designation | Publications                                                                            |
| AY808122     | Brevard, FL                              | <i>R. hageni</i>            | <i>R. nelsonae</i>      | [50]                                                                                    |
| AY808123     | Seminole Co. FL                          | <i>R. hageni</i>            | <i>R. nelsonae</i>      | [50]                                                                                    |
| AY257230-    | Brazos, TX                               | <i>R. hageni</i>            | <i>R. nelsonae</i>      | [64, 49] McKern et al., 2006                                                            |
| AY257235     | Cumberland Island, GA                    |                             |                         |                                                                                         |

\* Rh accessions identified to Rn mentioned in the published description of Rn in 2012 [27].

\*\*All 16S accessions were only those we could cross list with published COII sequence because the aforementioned accessions could not be aligned with multiple sequences using Muscle 3.8.425 for phylogenetic analysis.

<sup>†</sup>This same haplotype was also attributed to samples collected in Arkansas (Austin et al., 2004).
